# Supplementary material for: Tissue-Specific Enrichment of Lymphoma Risk Loci in Regulatory Elements
Source: PLoS One. 2015 Sep 30;10(9):e0139360. doi: 10.1371/journal.pone.0139360 (PMC4589387; doi:10.1371/journal.pone.0139360)
Supplement: S8 Table — Sorted according to p-value for r2>0.8. (XLSX) [file pone.0139360.s008.xlsx]

## Sheet: Sheet1
Cell Line	Roadmap Dnase Track	pValue (r2>0.2)	pValue (r2>0.4)	pValue (r2>0.6)	pValue (r2>0.8)	pValue (r2=1)
Primary B cells from cord blood	E031_15_coreMarks_segments.enhancers.bed	<0.0001	<0.0001	<0.0001	<0.0001	0.0006
Primary T cells from cord blood	E033_15_coreMarks_segments.enhancers.bed	<0.0001	<0.0001	<0.0001	<0.0001	0.134
Primary hematopoietic stem cells	E035_15_coreMarks_segments.enhancers.bed	<0.0001	<0.0001	<0.0001	<0.0001	0.0038
Primary T helper naive cells from peripheral blood	E039_15_coreMarks_segments.enhancers.bed	<0.0001	0.0001	0.0001	<0.0001	0.023
Primary T helper 17 cells PMA-I stimulated	E042_15_coreMarks_segments.enhancers.bed	<0.0001	<0.0001	<0.0001	<0.0001	0.0165
Primary T regulatory cells from peripheral blood	E044_15_coreMarks_segments.enhancers.bed	<0.0001	<0.0001	<0.0001	<0.0001	0.0164
Primary Natural Killer cells from peripheral blood	E046_15_coreMarks_segments.enhancers.bed	<0.0001	<0.0001	<0.0001	<0.0001	0.2176
Primary T CD8+ naive cells from peripheral blood	E047_15_coreMarks_segments.enhancers.bed	<0.0001	<0.0001	<0.0001	<0.0001	0.0409
Fetal Thymus	E093_15_coreMarks_segments.enhancers.bed	<0.0001	<0.0001	<0.0001	<0.0001	0.0114
GM12878 Lymphoblastoid Cells	E116_15_coreMarks_segments.enhancers.bed	<0.0001	<0.0001	<0.0001	<0.0001	0.0002
Primary B cells from peripheral blood	E032_15_coreMarks_segments.enhancers.bed	<0.0001	<0.0001	<0.0001	0.0001	<0.0001
Primary T helper cells from peripheral blood	E043_15_coreMarks_segments.enhancers.bed	<0.0001	0.0007	0.0003	0.0001	0.0015
Primary T cells effector/memory enriched from peripheral blood	E045_15_coreMarks_segments.enhancers.bed	<0.0001	<0.0001	<0.0001	0.0001	0.048
Primary T helper memory cells from peripheral blood 2	E037_15_coreMarks_segments.enhancers.bed	<0.0001	0.001	0.001	0.0002	0.0031
Primary T CD8+ memory cells from peripheral blood	E048_15_coreMarks_segments.enhancers.bed	<0.0001	<0.0001	<0.0001	0.0002	0.0205
Primary T helper naive cells from peripheral blood	E038_15_coreMarks_segments.enhancers.bed	<0.0001	0.0001	<0.0001	0.0005	0.0764
Primary T helper memory cells from peripheral blood 1	E040_15_coreMarks_segments.enhancers.bed	<0.0001	<0.0001	0.0013	0.0007	0.0018
Primary T cells from peripheral blood	E034_15_coreMarks_segments.enhancers.bed	<0.0001	<0.0001	<0.0001	0.0013	0.1566
Primary hematopoietic stem cells short term culture	E036_15_coreMarks_segments.enhancers.bed	<0.0001	0.0029	0.0008	0.0031	0.1571
Thymus	E112_15_coreMarks_segments.enhancers.bed	<0.0001	<0.0001	<0.0001	0.0036	0.0505
Primary mononuclear cells from peripheral blood	E062_15_coreMarks_segments.enhancers.bed	<0.0001	0.0007	0.0009	0.004	0.0997
Foreskin Melanocyte Primary Cells skin01	E059_15_coreMarks_segments.enhancers.bed	0.022	0.0265	0.0495	0.0115	0.0389
Primary T helper cells PMA-I stimulated	E041_15_coreMarks_segments.enhancers.bed	<0.0001	0.0004	0.0049	0.0122	0.2342
Monocytes-CD14+ RO01746 Primary Cells	E124_15_coreMarks_segments.enhancers.bed	<0.0001	0.0007	0.0003	0.0174	0.0716
Primary monocytes from peripheral blood	E029_15_coreMarks_segments.enhancers.bed	<0.0001	0.0028	0.0144	0.0179	0.0417
Primary hematopoietic stem cells G-CSF-mobilized Female	E050_15_coreMarks_segments.enhancers.bed	<0.0001	0.0001	0.0003	0.0249	0.2314
Adipose Nuclei	E063_15_coreMarks_segments.enhancers.bed	0.0006	0.0049	0.004	0.0266	0.0399
Sigmoid Colon	E106_15_coreMarks_segments.enhancers.bed	<0.0001	0.0007	0.0066	0.0327	0.8571
Duodenum Mucosa	E077_15_coreMarks_segments.enhancers.bed	0.0004	0.0065	0.0283	0.04	0.0794
Ovary	E097_15_coreMarks_segments.enhancers.bed	0.2113	0.3401	0.1691	0.0467	0.4321
Placenta	E091_15_coreMarks_segments.enhancers.bed	0.006	0.0043	0.0053	0.0483	0.0035
Spleen	E113_15_coreMarks_segments.enhancers.bed	<0.0001	0.013	0.0193	0.0588	0.4763
H9 Cells	E008_15_coreMarks_segments.enhancers.bed	0.0498	0.189	0.1152	0.0597	0.8092
Fetal Adrenal Gland	E080_15_coreMarks_segments.enhancers.bed	0.0009	0.0007	0.0011	0.0648	0.2323
H1 BMP4 Derived Trophoblast Cultured Cells	E005_15_coreMarks_segments.enhancers.bed	<0.0001	<0.0001	0.0003	0.0658	0.2931
Fetal Lung	E088_15_coreMarks_segments.enhancers.bed	0.2138	0.1812	0.0499	0.069	0.1095
Rectal Mucosa Donor 29	E101_15_coreMarks_segments.enhancers.bed	0.0007	0.0372	0.0713	0.076	0.0158
Gastric	E094_15_coreMarks_segments.enhancers.bed	0.0186	0.2594	0.2093	0.0767	0.5449
Foreskin Keratinocyte Primary Cells skin02	E057_15_coreMarks_segments.enhancers.bed	0.3332	0.0964	0.1023	0.0883	0.3672
HMEC Mammary Epithelial Primary Cells	E119_15_coreMarks_segments.enhancers.bed	0.1225	0.011	0.0124	0.1074	0.0623
Foreskin Keratinocyte Primary Cells skin03	E058_15_coreMarks_segments.enhancers.bed	0.1623	0.2356	0.3718	0.1092	0.3803
Stomach Smooth Muscle	E111_15_coreMarks_segments.enhancers.bed	0.2801	0.3586	0.2407	0.1214	0.249
K562 Leukemia Cells	E123_15_coreMarks_segments.enhancers.bed	0.0696	0.0338	0.0346	0.1245	0.2538
iPS DF 6.9 Cells	E021_15_coreMarks_segments.enhancers.bed	0.0207	0.1675	0.0447	0.1276	0.059
HeLa-S3 Cervical Carcinoma Cell Line	E117_15_coreMarks_segments.enhancers.bed	0.5905	0.3462	0.1984	0.1285	0.4477
Primary neutrophils from peripheral blood	E030_15_coreMarks_segments.enhancers.bed	0.0001	0.0145	0.0171	0.1571	0.0809
Liver	E066_15_coreMarks_segments.enhancers.bed	0.1831	0.1222	0.1634	0.1729	0.0328
Fetal Muscle Trunk	E089_15_coreMarks_segments.enhancers.bed	0.0668	0.0701	0.0496	0.1947	0.5862
HUVEC Umbilical Vein Endothelial Primary Cells	E122_15_coreMarks_segments.enhancers.bed	0.0492	0.4859	0.1734	0.1955	0.3041
Small Intestine	E109_15_coreMarks_segments.enhancers.bed	0.0001	0.0069	0.0412	0.2015	0.4954
Dnd41 TCell Leukemia Cell Line	E115_15_coreMarks_segments.enhancers.bed	0.0002	0.0036	0.0201	0.2045	0.2276
NH-A Astrocytes Primary Cells	E125_15_coreMarks_segments.enhancers.bed	0.1314	0.4503	0.2158	0.2083	0.2938
Muscle Satellite Cultured Cells	E052_15_coreMarks_segments.enhancers.bed	0.183	0.2003	0.1463	0.209	0.6465
Skeletal Muscle Male	E107_15_coreMarks_segments.enhancers.bed	0.0334	0.0485	0.2675	0.2115	0.8159
hESC Derived CD184+ Endoderm Cultured Cells	E011_15_coreMarks_segments.enhancers.bed	0.4336	0.6017	0.5673	0.2135	0.2607
Pancreas	E098_15_coreMarks_segments.enhancers.bed	0.0273	0.0238	0.0232	0.2144	0.1387
Foreskin Melanocyte Primary Cells skin03	E061_15_coreMarks_segments.enhancers.bed	0.0297	0.0779	0.0381	0.2196	0.4191
Mesenchymal Stem Cell Derived Adipocyte Cultured Cells	E023_15_coreMarks_segments.enhancers.bed	0.1128	0.3091	0.3148	0.2203	0.0659
Breast variant Human Mammary Epithelial Cells (vHMEC)	E028_15_coreMarks_segments.enhancers.bed	0.1257	0.1377	0.2624	0.2303	0.5433
Lung	E096_15_coreMarks_segments.enhancers.bed	0.0005	0.0929	0.0301	0.2342	0.3264
H9 Derived Neuron Cultured Cells	E010_15_coreMarks_segments.enhancers.bed	0.8052	0.7547	0.3132	0.2388	0.0508
NHDF-Ad Adult Dermal Fibroblast Primary Cells	E126_15_coreMarks_segments.enhancers.bed	0.3722	0.1797	0.1409	0.2408	0.472
Placenta Amnion	E099_15_coreMarks_segments.enhancers.bed	0.0551	0.1037	0.2946	0.2564	0.6561
Mesenchymal Stem Cell Derived Chondrocyte Cultured Cells	E049_15_coreMarks_segments.enhancers.bed	0.1054	0.6068	0.5103	0.2921	0.2707
ES-UCSF4 Cells	E024_15_coreMarks_segments.enhancers.bed	0.0992	0.3275	0.2506	0.2926	0.0353
Primary hematopoietic stem cells G-CSF-mobilized Male	E051_15_coreMarks_segments.enhancers.bed	0.003	0.0202	0.0252	0.3029	0.075
Duodenum Smooth Muscle	E078_15_coreMarks_segments.enhancers.bed	0.2489	0.3041	0.1792	0.3041	0.1103
iPS-15b Cells	E018_15_coreMarks_segments.enhancers.bed	0.1808	0.3042	0.0827	0.3065	0.5722
Osteoblast Primary Cells	E129_15_coreMarks_segments.enhancers.bed	0.1215	0.1376	0.1892	0.3088	0.6298
A549 EtOH 0.02pct Lung Carcinoma Cell Line	E114_15_coreMarks_segments.enhancers.bed	0.0279	0.0355	0.0114	0.3171	0.4283
NHEK-Epidermal Keratinocyte Primary Cells	E127_15_coreMarks_segments.enhancers.bed	0.232	0.2193	0.1341	0.3434	0.6342
Breast Myoepithelial Primary Cells	E027_15_coreMarks_segments.enhancers.bed	0.1457	0.0363	0.1402	0.3491	0.5453
iPS DF 19.11 Cells	E022_15_coreMarks_segments.enhancers.bed	0.004	0.0027	0.1927	0.3505	0.12
Rectal Mucosa Donor 31	E102_15_coreMarks_segments.enhancers.bed	0.0044	0.048	0.1469	0.3522	0.4336
Brain Germinal Matrix	E070_15_coreMarks_segments.enhancers.bed	0.0124	0.0207	0.044	0.3672	0.5833
H1 Cells	E003_15_coreMarks_segments.enhancers.bed	0.4598	0.5891	0.2786	0.3702	0.2609
Psoas Muscle	E100_15_coreMarks_segments.enhancers.bed	0.009	0.224	0.2295	0.3714	0.3664
HepG2 Hepatocellular Carcinoma Cell Line	E118_15_coreMarks_segments.enhancers.bed	0.0843	0.2196	0.0255	0.3736	0.4828
Skeletal Muscle Female	E108_15_coreMarks_segments.enhancers.bed	0.0767	0.1984	0.2982	0.3903	0.839
Right Atrium	E104_15_coreMarks_segments.enhancers.bed	0.0589	0.0611	0.0947	0.3912	0.4834
HSMM cell derived Skeletal Muscle Myotubes Cells	E121_15_coreMarks_segments.enhancers.bed	0.0302	0.1319	0.2593	0.4059	0.3406
Brain Anterior Caudate	E068_15_coreMarks_segments.enhancers.bed	0.0808	0.2389	0.1106	0.4194	0.7499
Bone Marrow Derived Cultured Mesenchymal Stem Cells	E026_15_coreMarks_segments.enhancers.bed	0.1471	0.3839	0.296	0.4225	0.3476
hESC Derived CD56+ Ectoderm Cultured Cells	E012_15_coreMarks_segments.enhancers.bed	0.4001	0.296	0.4243	0.4287	0.7207
HUES64 Cells	E016_15_coreMarks_segments.enhancers.bed	0.2891	0.5825	0.3733	0.4322	0.3022
ES-I3 Cells	E001_15_coreMarks_segments.enhancers.bed	0.0199	0.2191	0.1605	0.4396	0.4029
Fetal Intestine Small	E085_15_coreMarks_segments.enhancers.bed	0.0025	0.0017	0.013	0.4475	0.5096
hESC Derived CD56+ Mesoderm Cultured Cells	E013_15_coreMarks_segments.enhancers.bed	0.0408	0.2952	0.3033	0.4541	0.7385
Colon Smooth Muscle	E076_15_coreMarks_segments.enhancers.bed	0.0904	0.1	0.1371	0.4574	0.5461
Right Ventricle	E105_15_coreMarks_segments.enhancers.bed	0.0078	0.1001	0.043	0.4654	0.6793
HUES48 Cells	E014_15_coreMarks_segments.enhancers.bed	0.1287	0.3536	0.1747	0.4666	0.5669
iPS-18 Cells	E019_15_coreMarks_segments.enhancers.bed	0.3791	0.6618	0.4451	0.4707	0.5683
Left Ventricle	E095_15_coreMarks_segments.enhancers.bed	0.0154	0.4035	0.1359	0.4806	0.5404
Esophagus	E079_15_coreMarks_segments.enhancers.bed	0.1034	0.1943	0.4545	0.4824	0.561
Brain_Dorsolateral_Prefrontal_Cortex	E073_15_coreMarks_segments.enhancers.bed	0.5086	0.6024	0.4687	0.5076	0.5942
H1 BMP4 Derived Mesendoderm Cultured Cells	E004_15_coreMarks_segments.enhancers.bed	0.0082	0.0724	0.0799	0.5206	0.1027
Fetal Intestine Large	E084_15_coreMarks_segments.enhancers.bed	0.0042	0.0002	0.1805	0.5233	0.5627
IMR90 fetal lung fibroblasts Cell Line	E017_15_coreMarks_segments.enhancers.bed	0.0558	0.1461	0.2143	0.559	1
Fetal Muscle Leg	E090_15_coreMarks_segments.enhancers.bed	0.0074	0.3733	0.3825	0.5609	0.8758
HUES6 Cells	E015_15_coreMarks_segments.enhancers.bed	0.1718	0.5689	0.3495	0.562	0.6084
H1 Derived Neuronal Progenitor Cultured Cells	E007_15_coreMarks_segments.enhancers.bed	0.0302	0.0319	0.1168	0.582	0.5746
Ganglion Eminence derived primary cultured neurospheres	E054_15_coreMarks_segments.enhancers.bed	0.3032	0.7845	0.4073	0.6051	0.4325
Fetal Stomach	E092_15_coreMarks_segments.enhancers.bed	0.0352	0.0278	0.1293	0.6237	0.17
iPS-20b Cells	E020_15_coreMarks_segments.enhancers.bed	0.2516	0.6723	0.4912	0.6239	0.4252
HSMM Skeletal Muscle Myoblasts Cells	E120_15_coreMarks_segments.enhancers.bed	0.2248	0.3479	0.4268	0.6284	0.7561
H9 Derived Neuronal Progenitor Cultured Cells	E009_15_coreMarks_segments.enhancers.bed	0.3947	0.7919	0.4205	0.6442	0.1716
Brain Inferior Temporal Lobe	E072_15_coreMarks_segments.enhancers.bed	0.1336	0.6785	0.2244	0.6681	0.7041
Pancreatic Islets	E087_15_coreMarks_segments.enhancers.bed	0.4536	0.4711	0.2319	0.6704	0.4338
NHLF Lung Fibroblast Primary Cells	E128_15_coreMarks_segments.enhancers.bed	0.1308	0.1607	0.1423	0.6808	0.9229
Brain Hippocampus Middle	E071_15_coreMarks_segments.enhancers.bed	0.2417	0.6454	0.2924	0.6864	0.8099
ES-WA7 Cells	E002_15_coreMarks_segments.enhancers.bed	0.1531	0.3477	0.3055	0.692	0.389
Adipose Derived Mesenchymal Stem Cell Cultured Cells	E025_15_coreMarks_segments.enhancers.bed	0.0858	0.0504	0.1997	0.6964	0.8362
Fetal Heart	E083_15_coreMarks_segments.enhancers.bed	0.0636	0.3912	0.3151	0.7551	0.8492
Brain Angular Gyrus	E067_15_coreMarks_segments.enhancers.bed	0.0215	0.2058	0.098	0.7942	0.6826
Fetal Kidney	E086_15_coreMarks_segments.enhancers.bed	0.2591	0.6616	0.4751	0.798	0.8297
Foreskin Fibroblast Primary Cells skin01	E055_15_coreMarks_segments.enhancers.bed	0.0857	0.1203	0.4345	0.8149	0.9495
Fetal Brain Male	E081_15_coreMarks_segments.enhancers.bed	0.5572	0.4962	0.643	0.8158	1
Foreskin Fibroblast Primary Cells skin02	E056_15_coreMarks_segments.enhancers.bed	0.1394	0.4513	0.2017	0.8405	0.5814
Brain Cingulate Gyrus	E069_15_coreMarks_segments.enhancers.bed	0.1092	0.466	0.4341	0.8606	0.7449
Stomach Mucosa	E110_15_coreMarks_segments.enhancers.bed	0.0119	0.0887	0.1321	0.8792	0.857
Aorta	E065_15_coreMarks_segments.enhancers.bed	0.5685	0.4239	0.3455	0.8875	1
Brain Substantia Nigra	E074_15_coreMarks_segments.enhancers.bed	0.2443	0.5419	0.124	0.8891	0.795
Fetal Brain Female	E082_15_coreMarks_segments.enhancers.bed	0.7012	0.564	0.5319	0.8903	0.7866
Cortex derived primary cultured neurospheres	E053_15_coreMarks_segments.enhancers.bed	0.173	0.2519	0.142	0.9022	0.388
H1 Derived Mesenchymal Stem Cells	E006_15_coreMarks_segments.enhancers.bed	0.0198	0.0837	0.4419	0.9026	0.4866
Colonic Mucosa	E075_15_coreMarks_segments.enhancers.bed	0.0787	0.4067	0.5492	0.918	0.3447
Rectal Smooth Muscle	E103_15_coreMarks_segments.enhancers.bed	0.0369	0.4249	0.45	0.9332	0.8654
